# Supplementary material for: Tuning the photoluminescence property of carbon dots by ultraviolet light irradiation
Source: Royal Society of Chemistry journal article supplement (doi:10.1039/c9ra02080b), 2019-01-01
Supplement: c9ra02080b1.pdf [file c9ra02080b1.pdf]

## Supporting Information

# **Tuning the photoluminescence property of carbon dots by ultraviolet light irradiation**

Xiaoyu Li, Lihe Yan,\* Jinhai Si, Huanhuan Xu, and Yanmin Xu

*Key Laboratory for Physical Electronics and Devices of the Ministry of Education & Shaanxi Key Lab of Information Photonic Technique, School of Electronics & Information Engineering, Xi'an Jiaotong University, Xi'an, 710049, China.*

\*corresponding author: [liheyang@mail.xjtu.edu.cn](mailto:liheyang@mail.xjtu.edu.cn)

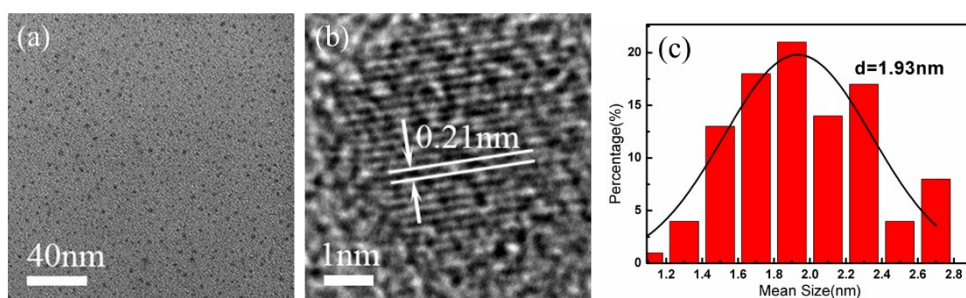

Fig. S1. (a) TEM, (b) HRTEM and (c) corresponding size distribution of p-CDs

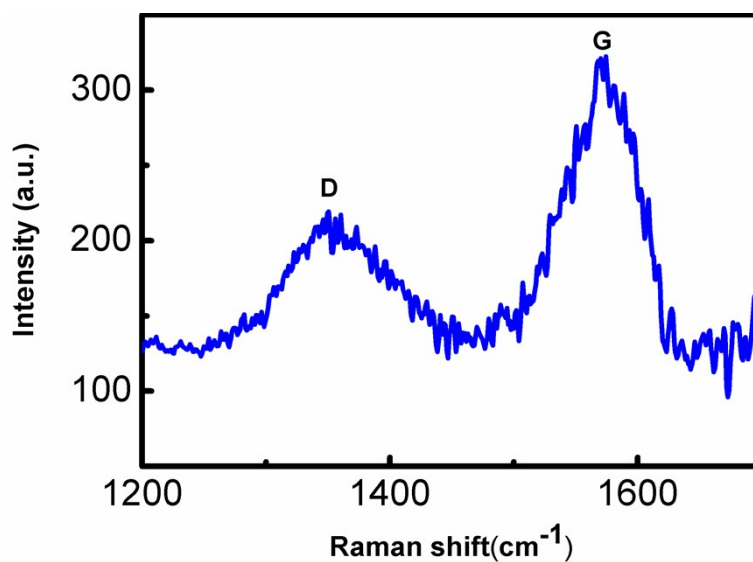

Fig. S2. Raman spectra of p-CDs.

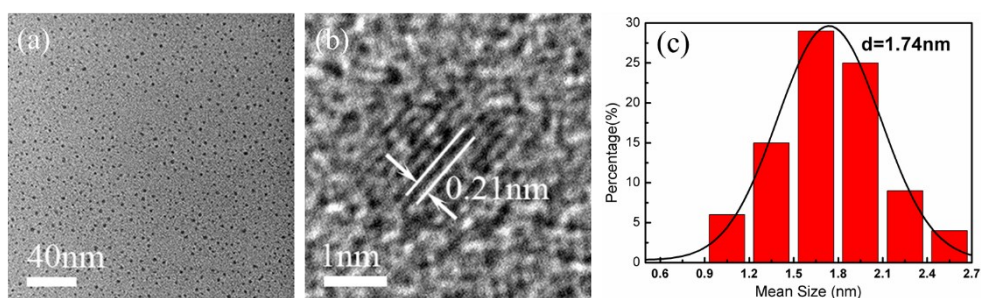

Fig. S3. (a) TEM, (b) HRTEM and (c) corresponding size distribution of 1 h-CDs.

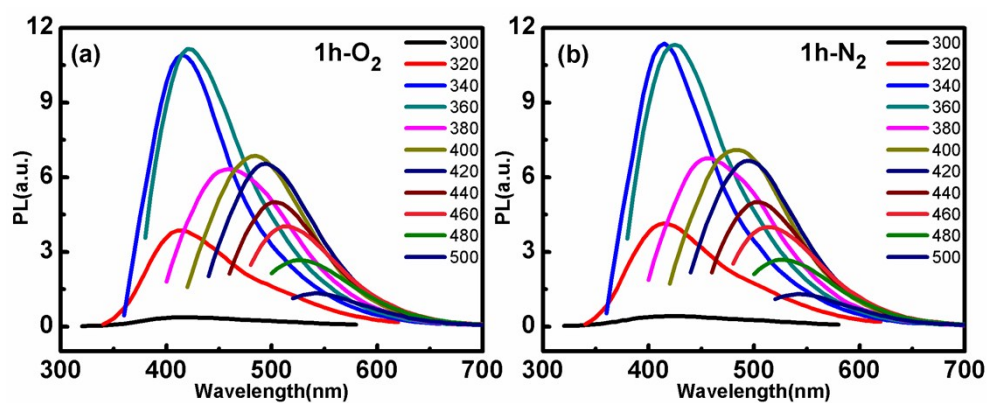

Fig. S4. Emission spectra of 1 h-CDs in (a) air and (b) nitrogen.

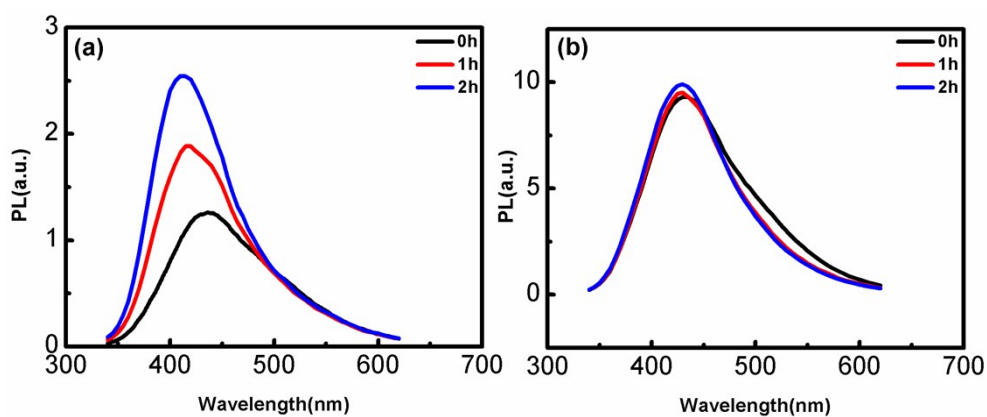

Fig. S5. Emission spectra (excited at 320 nm) of CDs irradiated by light with wavelength of (a) 395nm (b) 425nm for different time.
